# Supplementary material
Source: Springer Nature journal article supplement (https://www.springermedizin.de/resource/supplementary/12967_2011_843_MOESM3_ESM.pdf/9577162)

# Immune Effector Function Genes

# CCR5/CCR5 Ligands

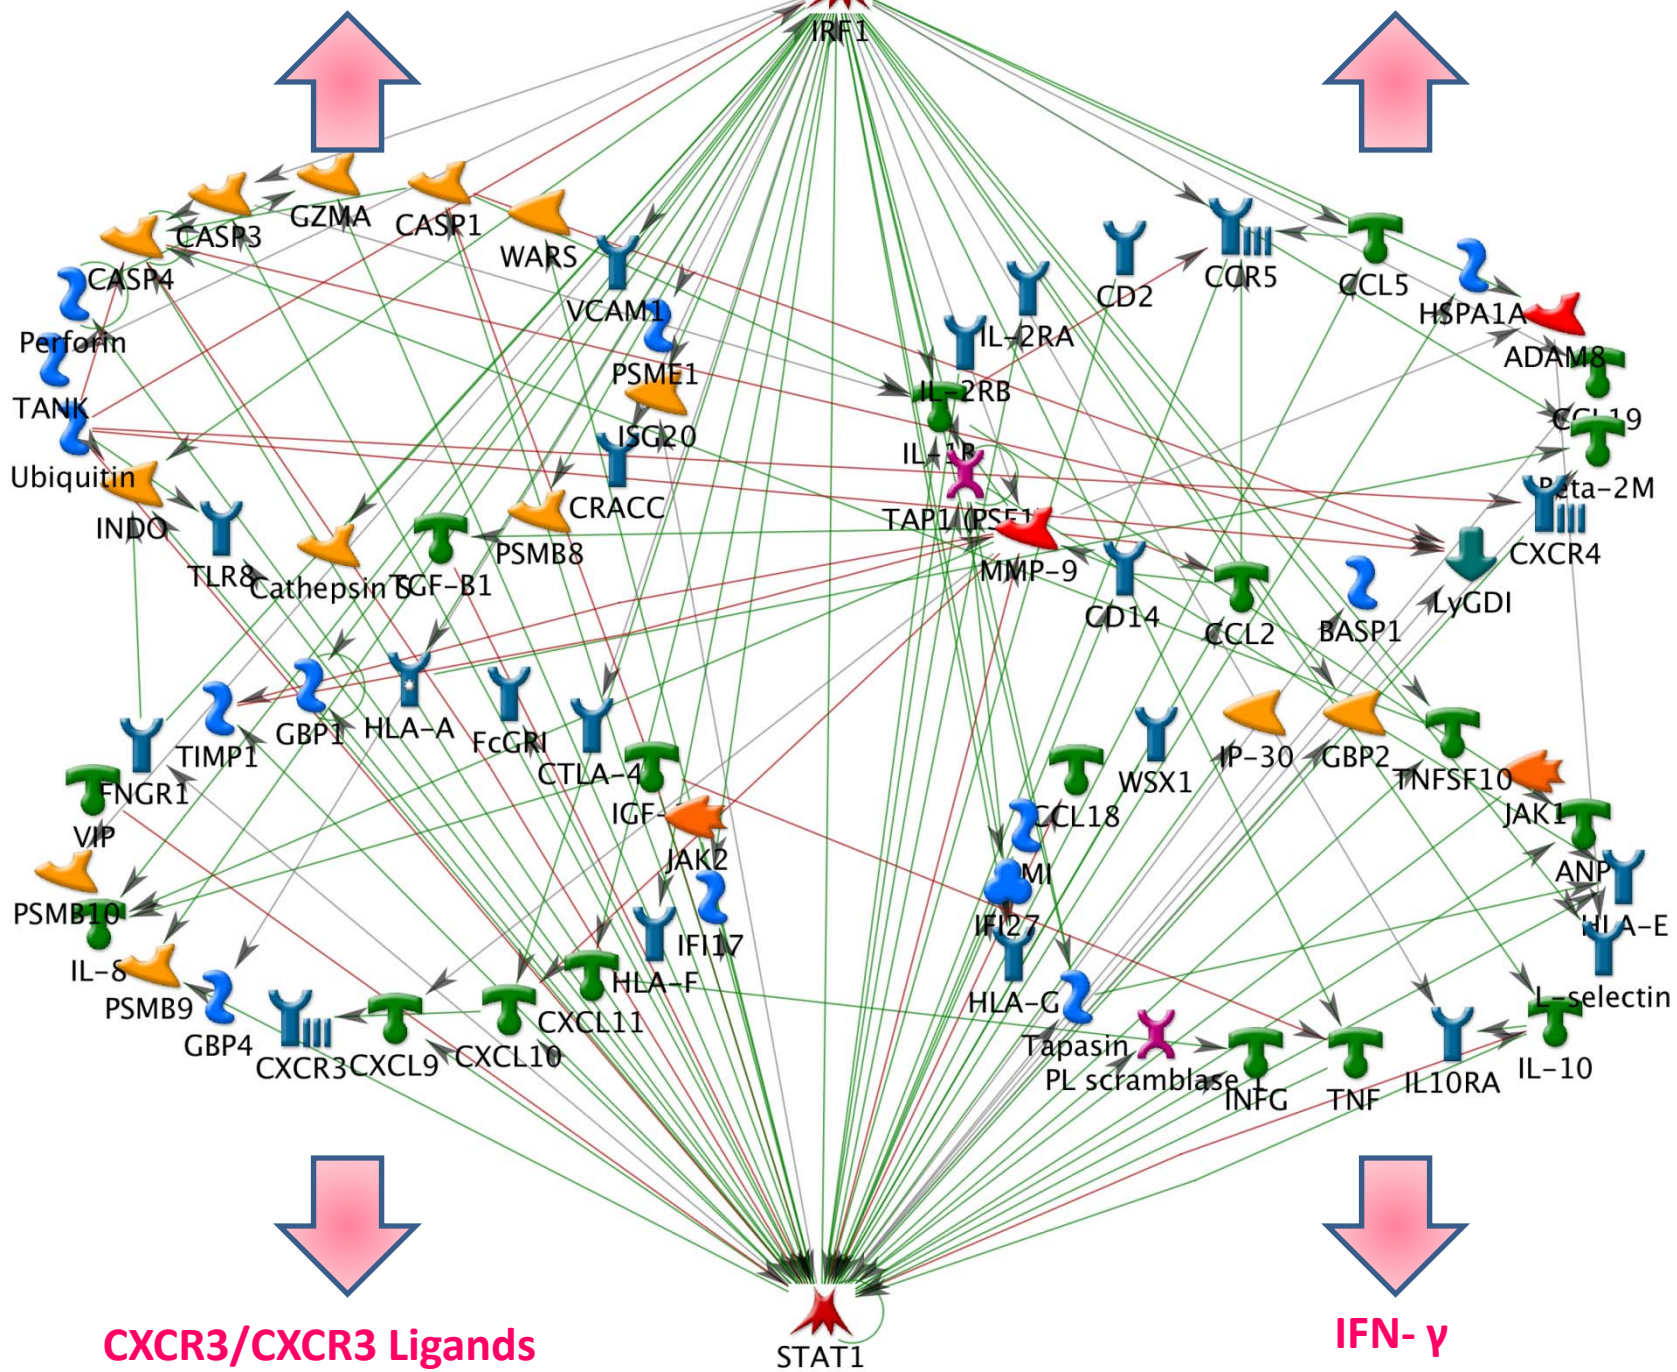

Supplement: MOESM3 [file 9577162]
